# Supplementary material for: Odds ratios from logistic, geometric, Poisson, and negative binomial regression models
Source: Springer Nature journal article supplement (doi:10.1186/s12874-018-0568-9), 2018-10-20
Supplement: MOESM1 [file 16214756]

# Additional File 1

## Detailed Simulation Results from Odds Ratios from Logistic, Geometric, Poisson, and Negative Binomial Regression Models

Christopher J. Sroka and Haikady N. Nagaraja

Table S.1: Percent Bias in OR Estimates from Geometric (G) and Logistic Regression (LR) Models

| Covariate | True  |       | Percent bias for various sample sizes ( $n$ ) |           |           |           |          |          |
|-----------|-------|-------|-----------------------------------------------|-----------|-----------|-----------|----------|----------|
|           | OR    | Model | $n = 1000$                                    | $n = 500$ | $n = 250$ | $n = 100$ | $n = 75$ | $n = 50$ |
| $x_1$     | 1.822 | G     | 0.1%                                          | -0.4%     | -0.2%     | -0.1%     | 1.1%     | 1.5%     |
|           |       | LR    | 0.4%                                          | 0.1%      | 0.7%      | 2.7%      | 3.7%     | 6.3%     |
| $x_2$     | 0.577 | G     | -0.2%                                         | -0.2%     | -0.5%     | -0.1%     | 0.1%     | -0.5%    |
|           |       | LR    | -0.6%                                         | -0.6%     | -0.7%     | -2.9%     | -3.4%    | -7.5%    |
| $x_3$     | 1.492 | G     | -0.1%                                         | 0.1%      | 0.4%      | -0.5%     | 0.7%     | 0.1%     |
|           |       | LR    | 0.2%                                          | 0.3%      | 1.2%      | 2.4%      | 4.1%     | 7.1%     |
| $x_4$     | 1.284 | G     | -0.1%                                         | 0.2%      | 0.3%      | -0.3%     | 0.2%     | 1.6%     |
|           |       | LR    | -0.2%                                         | 0.6%      | 0.6%      | 1.5%      | 2.3%     | 3.0%     |

Table S.2: Relative Mean Squared Error (MSE)<sup>a</sup> of log OR from Geometric and Logistic Regression Models

| Covariate | True  |  | Sample sizes ( $n$ ) |           |           |           |          |          |
|-----------|-------|--|----------------------|-----------|-----------|-----------|----------|----------|
|           | OR    |  | $n = 1000$           | $n = 500$ | $n = 250$ | $n = 100$ | $n = 75$ | $n = 50$ |
| $x_1$     | 1.822 |  | 43.6%                | 41.4%     | 39.2%     | 40.9%     | 40.8%    | 39.8%    |
| $x_2$     | 0.577 |  | 42.0%                | 40.3%     | 41.0%     | 36.5%     | 37.3%    | 29.4%    |
| $x_3$     | 1.492 |  | 42.0%                | 41.4%     | 38.3%     | 38.3%     | 37.0%    | 29.4%    |
| $x_4$     | 1.284 |  | 42.0%                | 41.3%     | 39.6%     | 37.6%     | 35.3%    | 36.6%    |

<sup>a</sup>MSE for Poisson model as a percentage of MSE for logistic regression

Table S.3: Average Relative Width of Confidence Interval<sup>a</sup> for OR from Geometric and Logistic Regression Models

| Covariate | True  | Sample sizes ( $n$ ) |           |           |           |          |          |
|-----------|-------|----------------------|-----------|-----------|-----------|----------|----------|
|           | OR    | $n = 1000$           | $n = 500$ | $n = 250$ | $n = 100$ | $n = 75$ | $n = 50$ |
| $x_1$     | 1.822 | 64.6%                | 64.0%     | 63.1%     | 60.9%     | 60.7%    | 57.7%    |
| $x_2$     | 0.577 | 64.7%                | 64.5%     | 64.0%     | 62.2%     | 60.5%    | 59.5%    |
| $x_3$     | 1.492 | 64.4%                | 63.9%     | 62.0%     | 59.4%     | 57.9%    | 56.0%    |
| $x_4$     | 1.284 | 64.7%                | 64.0%     | 62.2%     | 59.8%     | 57.5%    | 58.4%    |

<sup>a</sup>The width of the 95% confidence interval under the Geometric model divided by the width under the logistic regression model averaged across all simulations

Table S.4: Actual Coverage of Nominal 95% Confidence Interval from Geometric (G) and Logistic Regression (LR) Models

| Covariate | True  |       | Actual coverage for various sample sizes ( $n$ ) |           |           |           |          |          |
|-----------|-------|-------|--------------------------------------------------|-----------|-----------|-----------|----------|----------|
|           | OR    | Model | $n = 1000$                                       | $n = 500$ | $n = 250$ | $n = 100$ | $n = 75$ | $n = 50$ |
| $x_1$     | 1.822 | G     | 94.7%                                            | 94.7%     | 94.8%     | 93.8%     | 93.7%    | 92.7%    |
|           |       | LR    | 95.2%                                            | 94.9%     | 94.4%     | 94.5%     | 95.4%    | 94.9%    |
| $x_2$     | 0.577 | G     | 95.0%                                            | 95.4%     | 94.9%     | 94.4%     | 93.3%    | 92.9%    |
|           |       | LR    | 94.8%                                            | 94.9%     | 94.9%     | 94.6%     | 94.6%    | 94.5%    |
| $x_3$     | 1.492 | G     | 94.8%                                            | 94.6%     | 94.6%     | 93.8%     | 93.4%    | 93.7%    |
|           |       | LR    | 95.1%                                            | 94.9%     | 95.0%     | 94.7%     | 94.3%    | 94.6%    |
| $x_4$     | 1.284 | G     | 95.1%                                            | 95.1%     | 94.7%     | 94.0%     | 94.1%    | 93.1%    |
|           |       | LR    | 95.4%                                            | 94.8%     | 94.8%     | 94.2%     | 94.9%    | 95.0%    |

Table S.5: Percent Bias in OR Estimates from Poisson (P) and Logistic Regression (LR) Models

| Covariate | True  |       | Percent bias for various sample sizes ( $n$ ) |           |           |           |          |          |
|-----------|-------|-------|-----------------------------------------------|-----------|-----------|-----------|----------|----------|
|           | OR    | Model | $n = 1000$                                    | $n = 500$ | $n = 250$ | $n = 100$ | $n = 75$ | $n = 50$ |
| $x_1$     | 1.822 | P     | 0.4%                                          | 0.4%      | 1.3%      | 0.5%      | 2.0%     | 3.2%     |
|           |       | LR    | 0.5%                                          | 0.7%      | 2.0%      | 2.7%      | 4.2%     | 7.2%     |
| $x_2$     | 0.577 | P     | 0.0%                                          | 0.3%      | -1.0%     | 0.0%      | -2.4%    | -3.0%    |
|           |       | LR    | -0.2%                                         | 0.0%      | -1.4%     | -2.3%     | -5.4%    | -7.5%    |
| $x_3$     | 1.492 | P     | 0.0%                                          | 0.2%      | 0.6%      | 0.5%      | 0.5%     | 1.2%     |
|           |       | LR    | 0.3%                                          | 0.5%      | 1.0%      | 2.5%      | 2.7%     | 3.8%     |
| $x_4$     | 1.284 | P     | 0.1%                                          | 0.0%      | 0.4%      | -1.2%     | 0.2%     | 1.9%     |
|           |       | LR    | 0.2%                                          | 0.2%      | 0.8%      | 1.0%      | 1.9%     | 2.0%     |

Table S.6: Relative Mean Squared Error (MSE)<sup>a</sup> of log OR from Poisson and Logistic Regression Models

| Covariate | True  | Sample sizes ( $n$ ) |           |           |           |          |          |
|-----------|-------|----------------------|-----------|-----------|-----------|----------|----------|
|           | OR    | $n = 1000$           | $n = 500$ | $n = 250$ | $n = 100$ | $n = 75$ | $n = 50$ |
| $x_1$     | 1.822 | 65.8%                | 60.7%     | 63.1%     | 58.7%     | 59.6%    | 60.8%    |
| $x_2$     | 0.577 | 63.2%                | 62.4%     | 61.9%     | 58.6%     | 55.1%    | 52.0%    |
| $x_3$     | 1.492 | 62.8%                | 63.2%     | 60.4%     | 55.6%     | 56.0%    | 55.1%    |
| $x_4$     | 1.284 | 61.8%                | 62.9%     | 59.2%     | 58.8%     | 55.3%    | 53.6%    |

<sup>a</sup>MSE for Poisson model as a percentage of MSE for logistic regression

Table S.7: Average Relative Width of Confidence Interval<sup>a</sup> for OR from Poisson and Logistic Regression Models

| Covariate | True  | Sample sizes ( $n$ ) |           |           |           |          |          |
|-----------|-------|----------------------|-----------|-----------|-----------|----------|----------|
|           | OR    | $n = 1000$           | $n = 500$ | $n = 250$ | $n = 100$ | $n = 75$ | $n = 50$ |
| $x_1$     | 1.822 | 79.2%                | 78.8%     | 78.0%     | 76.4%     | 76.3%    | 74.5%    |
| $x_2$     | 0.577 | 79.3%                | 79.2%     | 79.1%     | 78.4%     | 77.4%    | 76.1%    |
| $x_3$     | 1.492 | 79.1%                | 78.8%     | 77.6%     | 75.7%     | 74.8%    | 74.5%    |
| $x_4$     | 1.284 | 79.3%                | 79.1%     | 77.7%     | 75.5%     | 74.2%    | 76.2%    |

<sup>a</sup>The width of the 95% confidence interval under the Poisson model divided by the width under the logistic regression model averaged across all simulations

Table S.8: Actual Coverage of Nominal 95% Confidence Interval from Poisson (P) and Logistic Regression (LR) Models

| Covariate | True  | Model | Actual coverage for various sample sizes ( $n$ ) |           |           |           |          |          |
|-----------|-------|-------|--------------------------------------------------|-----------|-----------|-----------|----------|----------|
|           | OR    |       | $n = 1000$                                       | $n = 500$ | $n = 250$ | $n = 100$ | $n = 75$ | $n = 50$ |
| $x_1$     | 1.822 | P     | 95.0%                                            | 94.8%     | 94.8%     | 94.8%     | 94.8%    | 95.7%    |
|           |       | LR    | 95.7%                                            | 94.6%     | 95.2%     | 94.8%     | 94.6%    | 94.9%    |
| $x_2$     | 0.577 | P     | 94.2%                                            | 94.9%     | 95.0%     | 94.8%     | 94.8%    | 94.8%    |
|           |       | LR    | 94.4%                                            | 95.2%     | 94.9%     | 95.0%     | 94.3%    | 94.6%    |
| $x_3$     | 1.492 | P     | 94.1%                                            | 95.0%     | 95.1%     | 94.8%     | 95.6%    | 94.6%    |
|           |       | LR    | 94.6%                                            | 95.2%     | 95.7%     | 94.5%     | 95.1%    | 94.6%    |
| $x_4$     | 1.284 | P     | 95.0%                                            | 94.4%     | 94.9%     | 94.7%     | 94.6%    | 95.2%    |
|           |       | LR    | 94.8%                                            | 94.6%     | 94.6%     | 95.3%     | 95.0%    | 94.8%    |

Table S.9: Relative Bias in OR Estimates from Negative Binomial (NB) and Logistic Regression (LR) Models

| Covariate | True  |       | Percent bias for various sample sizes ( $n$ ) |           |           |           |          |          |
|-----------|-------|-------|-----------------------------------------------|-----------|-----------|-----------|----------|----------|
|           | OR    | Model | $n = 1000$                                    | $n = 500$ | $n = 250$ | $n = 100$ | $n = 75$ | $n = 50$ |
| $x_1$     | 1.822 | NB    | 0.4%                                          | 0.9%      | 1.6%      | 5.2%      | 5.9%     | 10.2%    |
|           |       | LR    | 0.4%                                          | 0.6%      | 1.7%      | 4.5%      | 4.9%     | 6.7%     |
| $x_2$     | 0.577 | NB    | -0.3%                                         | -0.7%     | -1.6%     | -3.8%     | -4.7%    | -5.9%    |
|           |       | LR    | -0.4%                                         | -0.7%     | -0.9%     | -3.9%     | -4.0%    | -6.9%    |
| $x_3$     | 1.492 | NB    | 0.2%                                          | 0.6%      | 1.0%      | 2.1%      | 4.3%     | 5.5%     |
|           |       | LR    | 0.0%                                          | 0.6%      | 0.5%      | 1.9%      | 3.2%     | 5.5%     |
| $x_4$     | 1.284 | NB    | 0.1%                                          | 0.4%      | 0.8%      | 0.1%      | 1.7%     | 5.7%     |
|           |       | LR    | -0.1%                                         | 0.3%      | 0.6%      | 0.3%      | 1.4%     | 3.3%     |

Table S.10: Relative Mean Squared Error (MSE)<sup>a</sup> of log OR from Negative Binomial and Logistic Regression Models

| Covariate | True  |            | Sample sizes ( $n$ ) |           |           |          |          |
|-----------|-------|------------|----------------------|-----------|-----------|----------|----------|
|           | OR    | $n = 1000$ | $n = 500$            | $n = 250$ | $n = 100$ | $n = 75$ | $n = 50$ |
| $x_1$     | 1.822 | 42.1%      | 42.3%                | 42.3%     | 45.8%     | 47.5%    | 50.9%    |
| $x_2$     | 0.577 | 40.6%      | 43.0%                | 43.1%     | 43.1%     | 42.1%    | 37.4%    |
| $x_3$     | 1.492 | 40.2%      | 40.9%                | 39.5%     | 41.9%     | 42.3%    | 44.8%    |
| $x_4$     | 1.284 | 41.1%      | 39.7%                | 38.4%     | 39.6%     | 39.7%    | 43.8%    |

<sup>a</sup>MSE for negative binomial model as a percentage of MSE for logistic regression

Table S.11: Average Relative Width of Confidence Interval<sup>a</sup> for OR from Negative Binomial and Logistic Regression Models

| Covariate | True  |            | Sample sizes ( $n$ ) |           |           |          |          |
|-----------|-------|------------|----------------------|-----------|-----------|----------|----------|
|           | OR    | $n = 1000$ | $n = 500$            | $n = 250$ | $n = 100$ | $n = 75$ | $n = 50$ |
| $x_1$     | 1.822 | 64.3%      | 64.4%                | 64.1%     | 65.8%     | 66.4%    | 69.1%    |
| $x_2$     | 0.577 | 63.7%      | 63.7%                | 63.5%     | 63.1%     | 61.9%    | 62.4%    |
| $x_3$     | 1.492 | 63.1%      | 62.8%                | 62.2%     | 63.0%     | 63.1%    | 64.6%    |
| $x_4$     | 1.284 | 62.6%      | 62.6%                | 61.4%     | 62.1%     | 60.9%    | 65.6%    |

<sup>a</sup>The width of the 95% confidence interval under the negative binomial model divided by the width under the logistic regression model averaged across all simulations

Table S.12: Actual Coverage of Nominal 95% Confidence Interval from Negative Binomial (NB) and Logistic Regression (LR) Models

| Covariate | True  |       | Actual coverage for various sample sizes ( $n$ ) |           |           |           |          |          |
|-----------|-------|-------|--------------------------------------------------|-----------|-----------|-----------|----------|----------|
|           | OR    | Model | $n = 1000$                                       | $n = 500$ | $n = 250$ | $n = 100$ | $n = 75$ | $n = 50$ |
| $x_1$     | 1.822 | NB    | 95.3%                                            | 95.2%     | 94.7%     | 94.7%     | 94.5%    | 93.8%    |
|           |       | LR    | 94.9%                                            | 94.9%     | 95.0%     | 95.2%     | 95.0%    | 95.2%    |
| $x_2$     | 0.577 | NB    | 95.2%                                            | 94.8%     | 94.4%     | 94.3%     | 94.7%    | 94.6%    |
|           |       | LR    | 95.1%                                            | 95.1%     | 94.9%     | 94.4%     | 94.1%    | 94.7%    |
| $x_3$     | 1.492 | NB    | 95.3%                                            | 95.0%     | 95.5%     | 94.8%     | 94.9%    | 94.4%    |
|           |       | LR    | 95.3%                                            | 95.2%     | 95.7%     | 95.0%     | 94.8%    | 94.7%    |
| $x_4$     | 1.284 | NB    | 95.0%                                            | 95.0%     | 95.1%     | 94.2%     | 93.9%    | 94.0%    |
|           |       | LR    | 95.4%                                            | 95.0%     | 95.0%     | 94.5%     | 95.1%    | 94.3%    |

Table S.13: Relative Bias in OR Estimates from Poisson (P) and Logistic Regression (LR) Models When Data Follow a Negative Binomial Distribution

| $\delta = 0.5$ |       |       |                                               |           |           |           |          |          |
|----------------|-------|-------|-----------------------------------------------|-----------|-----------|-----------|----------|----------|
| Covariate      | True  | Model | Percent bias for various sample sizes ( $n$ ) |           |           |           |          |          |
|                | OR    |       | $n = 1000$                                    | $n = 500$ | $n = 250$ | $n = 100$ | $n = 75$ | $n = 50$ |
| $x_1$          | 1.822 | P     | 411.0%                                        | 438.2%    | 475.9%    | 419.9%    | 412.6%   | 356.7%   |
|                |       | LR    | 0.2%                                          | 0.6%      | 0.7%      | 2.7%      | 4.4%     | 7.7%     |
| $x_2$          | 0.577 | P     | -78.1%                                        | -78.7%    | -79.9%    | -79.2%    | -82.3%   | -78.3%   |
|                |       | LR    | -0.3%                                         | -0.9%     | -0.9%     | -3.0%     | -4.1%    | -7.4%    |
| $x_3$          | 1.492 | P     | 196.2%                                        | 217.7%    | 234.4%    | 223.7%    | 252.5%   | 173.4%   |
|                |       | LR    | 0.0%                                          | 0.3%      | 0.6%      | 2.5%      | 3.7%     | 6.2%     |
| $x_4$          | 1.284 | P     | 99.4%                                         | 101.8%    | 115.2%    | 137.3%    | 105.7%   | 62.8%    |
|                |       | LR    | 0.1%                                          | 0.3%      | 0.2%      | 1.9%      | 1.8%     | 4.1%     |

  

| $\delta = 1$ |       |       |                                               |           |           |           |          |          |
|--------------|-------|-------|-----------------------------------------------|-----------|-----------|-----------|----------|----------|
| Covariate    | True  | Model | Percent bias for various sample sizes ( $n$ ) |           |           |           |          |          |
|              | OR    |       | $n = 1000$                                    | $n = 500$ | $n = 250$ | $n = 100$ | $n = 75$ | $n = 50$ |
| $x_1$        | 1.822 | P     | 67.9%                                         | 69.7%     | 73.6%     | 71.2%     | 72.6%    | 70.7%    |
|              |       | LR    | 0.5%                                          | 0.5%      | 1.2%      | 3.1%      | 6.3%     | 8.7%     |
| $x_2$        | 0.577 | P     | -38.2%                                        | -38.6%    | -39.4%    | -39.3%    | -40.5%   | -40.8%   |
|              |       | LR    | -0.6%                                         | -0.8%     | -0.9%     | -3.3%     | -3.7%    | -10.3%   |
| $x_3$        | 1.492 | P     | 40.4%                                         | 43.9%     | 45.2%     | 45.2%     | 48.2%    | 42.9%    |
|              |       | LR    | 0.0%                                          | 0.7%      | 0.5%      | 1.0%      | 4.0%     | 8.1%     |
| $x_4$        | 1.284 | P     | 24.3%                                         | 25.6%     | 26.5%     | 27.7%     | 24.9%    | 20.4%    |
|              |       | LR    | -0.1%                                         | 0.3%      | 0.0%      | 1.4%      | 1.4%     | 1.2%     |

  

| $\delta = 5$ |       |       |                                               |           |           |           |          |          |
|--------------|-------|-------|-----------------------------------------------|-----------|-----------|-----------|----------|----------|
| Covariate    | True  | Model | Percent bias for various sample sizes ( $n$ ) |           |           |           |          |          |
|              | OR    |       | $n = 1000$                                    | $n = 500$ | $n = 250$ | $n = 100$ | $n = 75$ | $n = 50$ |
| $x_1$        | 1.822 | P     | 7.9%                                          | 8.1%      | 8.6%      | 10.5%     | 10.1%    | 10.3%    |
|              |       | LR    | 0.1%                                          | 0.7%      | 1.1%      | 4.1%      | 4.8%     | 6.1%     |
| $x_2$        | 0.577 | P     | -6.8%                                         | -6.7%     | -7.7%     | -7.9%     | -7.6%    | -9.5%    |
|              |       | LR    | -0.2%                                         | -0.2%     | -1.4%     | -3.5%     | -3.9%    | -8.4%    |
| $x_3$        | 1.492 | P     | 5.5%                                          | 5.4%      | 5.7%      | 6.1%      | 7.2%     | 7.4%     |
|              |       | LR    | 0.3%                                          | 0.4%      | 0.5%      | 3.1%      | 4.1%     | 5.6%     |
| $x_4$        | 1.284 | P     | 3.5%                                          | 3.3%      | 3.0%      | 4.5%      | 4.8%     | 4.9%     |
|              |       | LR    | 0.3%                                          | 0.0%      | -0.1%     | 2.6%      | 2.6%     |          |

  

| $\delta = 10$ |       |       |                                               |           |           |           |          |          |
|---------------|-------|-------|-----------------------------------------------|-----------|-----------|-----------|----------|----------|
| Covariate     | True  | Model | Percent bias for various sample sizes ( $n$ ) |           |           |           |          |          |
|               | OR    |       | $n = 1000$                                    | $n = 500$ | $n = 250$ | $n = 100$ | $n = 75$ | $n = 50$ |
| $x_1$         | 1.822 | P     | 3.9%                                          | 4.1%      | 4.5%      | 5.1%      | 5.5%     | 7.7%     |
|               |       | LR    | 0.3%                                          | 0.5%      | 1.1%      | 2.8%      | 5.1%     | 7.7%     |
| $x_2$         | 0.577 | P     | -3.5%                                         | -3.3%     | -3.7%     | -4.3%     | -5.1%    | -6.4%    |
|               |       | LR    | -0.3%                                         | -0.2%     | -1.0%     | -3.4%     | -4.8%    | -9.7%    |
| $x_3$         | 1.492 | P     | 2.4%                                          | 2.6%      | 3.3%      | 2.5%      | 4.2%     | 4.1%     |
|               |       | LR    | 0.1%                                          | 0.3%      | 1.3%      | 1.9%      | 3.5%     | 6.3%     |
| $x_4$         | 1.284 | P     | 1.7%                                          | 1.8%      | 1.9%      | 1.8%      | 1.3%     | 3.8%     |
|               |       | LR    | 0.1%                                          | 0.0%      | 0.2%      | 1.2%      | 1.9%     | 1.3%     |

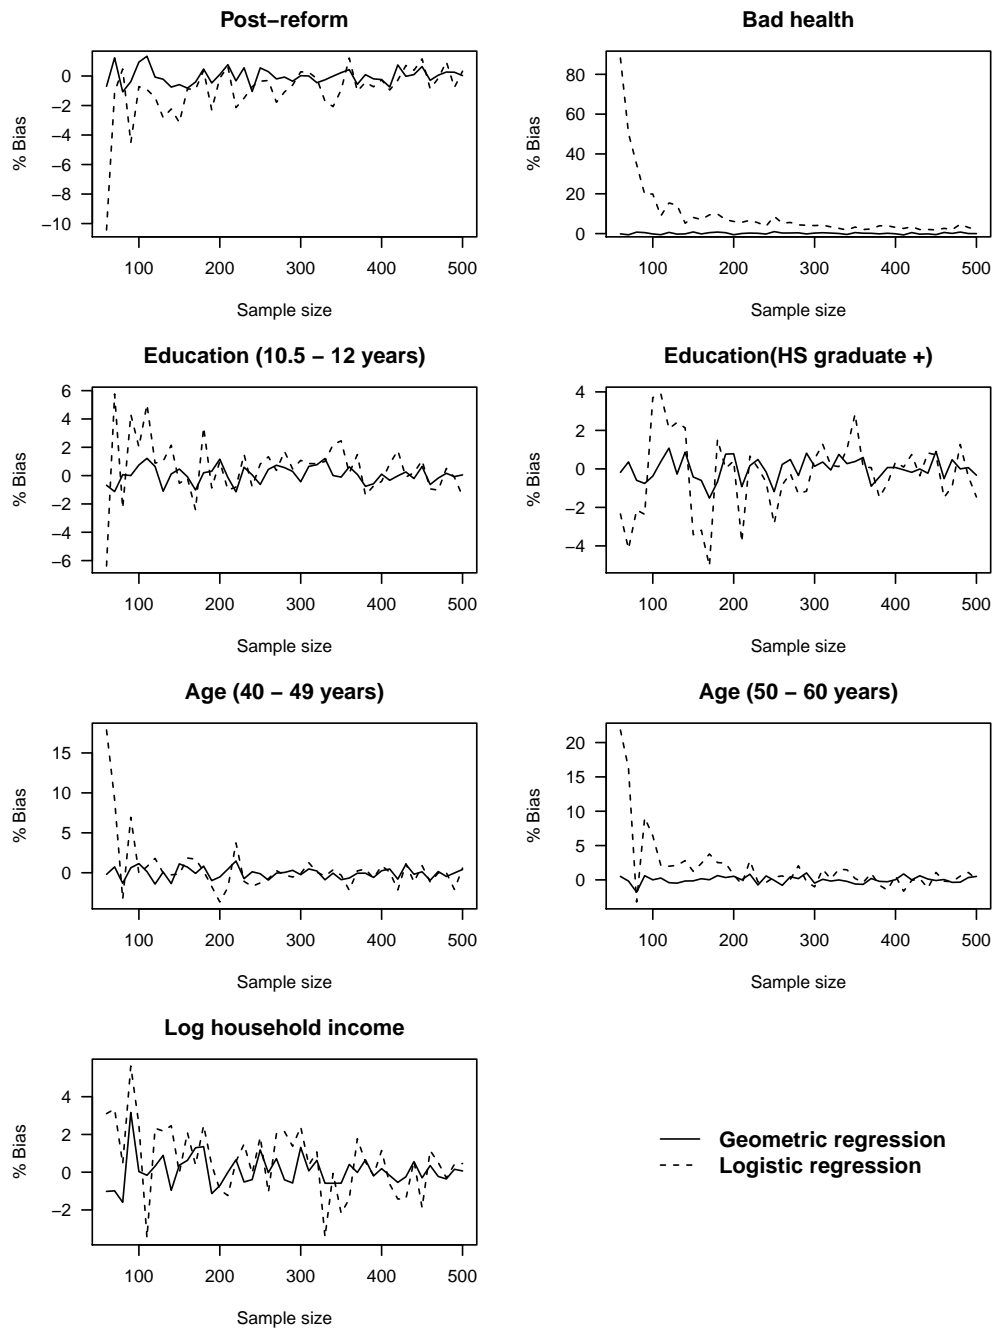

Figure S.1: Percent bias associated with ORs estimated from geometric and logistic regressions of physician visits
